# Supplementary material
Source: PubMed Central journal article supplement (PMC6657441)
Supplement: msz002_supp.pdf [file msz002_supp.pdf]

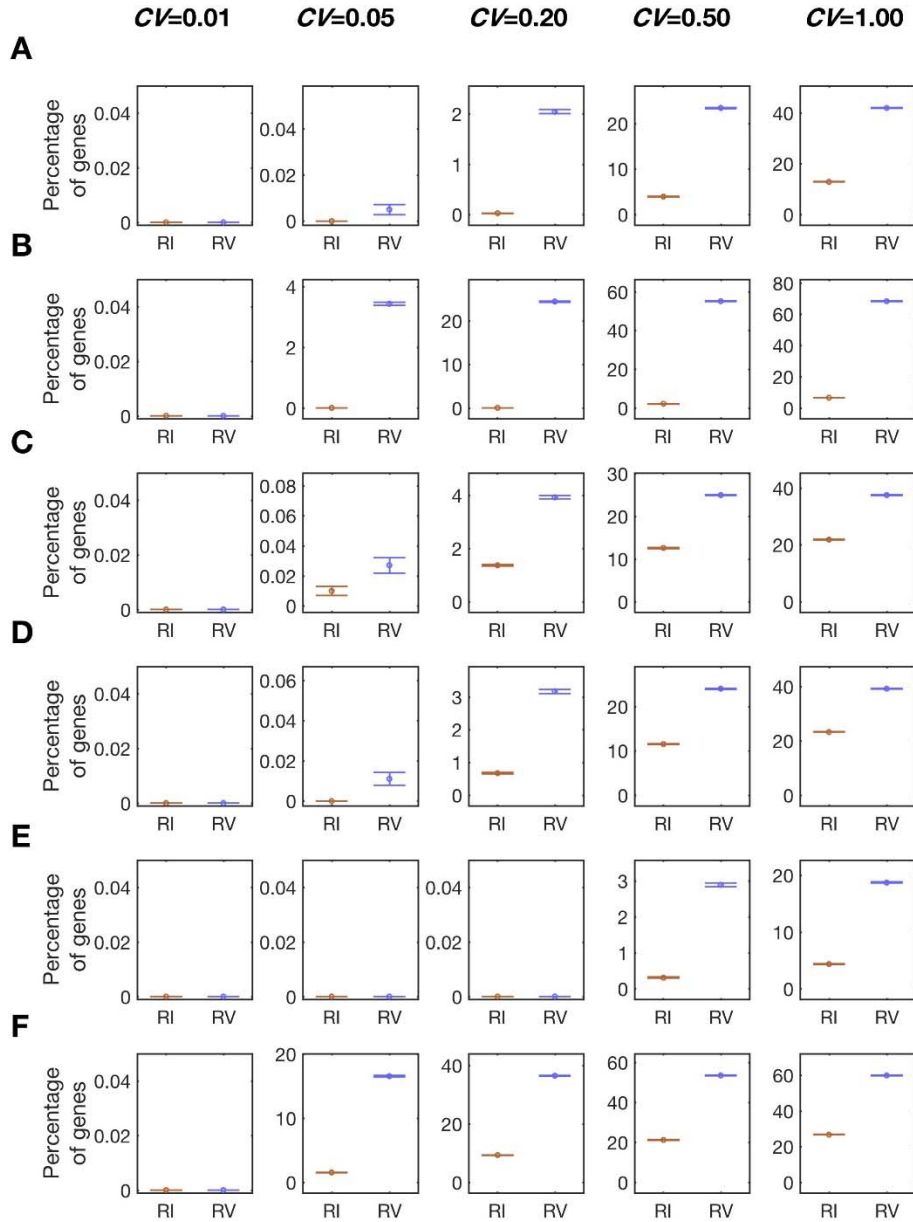

**Figure S1.** Rates of false identification of gene expression reversion (RV) and reinforcement (RI) determined by computer simulation. The mean expression level ( $\mu$ ) used = 10. The coefficient of variation (CV) used is marked on the top of each column. Each row has a different combination of the cutoff ( $c$ ), sample size at original stage ( $n_o$ ), sample size at the plastic stage ( $n_p$ ), and sample size at the adapted stage ( $n_a$ ). Results shown are mean and standard errors estimated from 100 rounds of simulation, where each simulation contains 1000 hypothetical genes with the same  $\mu$  and CV. See main text for definitions of RV and RI. **(A)** Simulation results under  $n_o = 6$ ,  $n_p = 6$ ,  $n_a = 6$ , and  $c = 0.2L_o$ , where  $L_o$  is the observed mean expression level at stage  $o$ . **(B)** Simulation results under  $n_o = 6$ ,  $n_p = 1$ ,  $n_a = 6$ , and  $c = 0.2L_o$ . **(C)** Simulation results under  $n_o = 1$ ,  $n_p = 6$ ,  $n_a = 6$ , and  $c = 0.2L_o$ . **(D)** Simulation results under  $n_o = 6$ ,  $n_p = 6$ ,  $n_a = 1$ , and  $c = 0.2L_o$ . **(E)** Simulation results under  $n_o = 6$ ,  $n_p = 6$ ,  $n_a = 6$ , and  $c = 0.5L_o$ . **(F)** Simulation results under  $n_o = 6$ ,  $n_p = 6$ ,  $n_a = 6$ , and  $c = 0.05L_o$ .

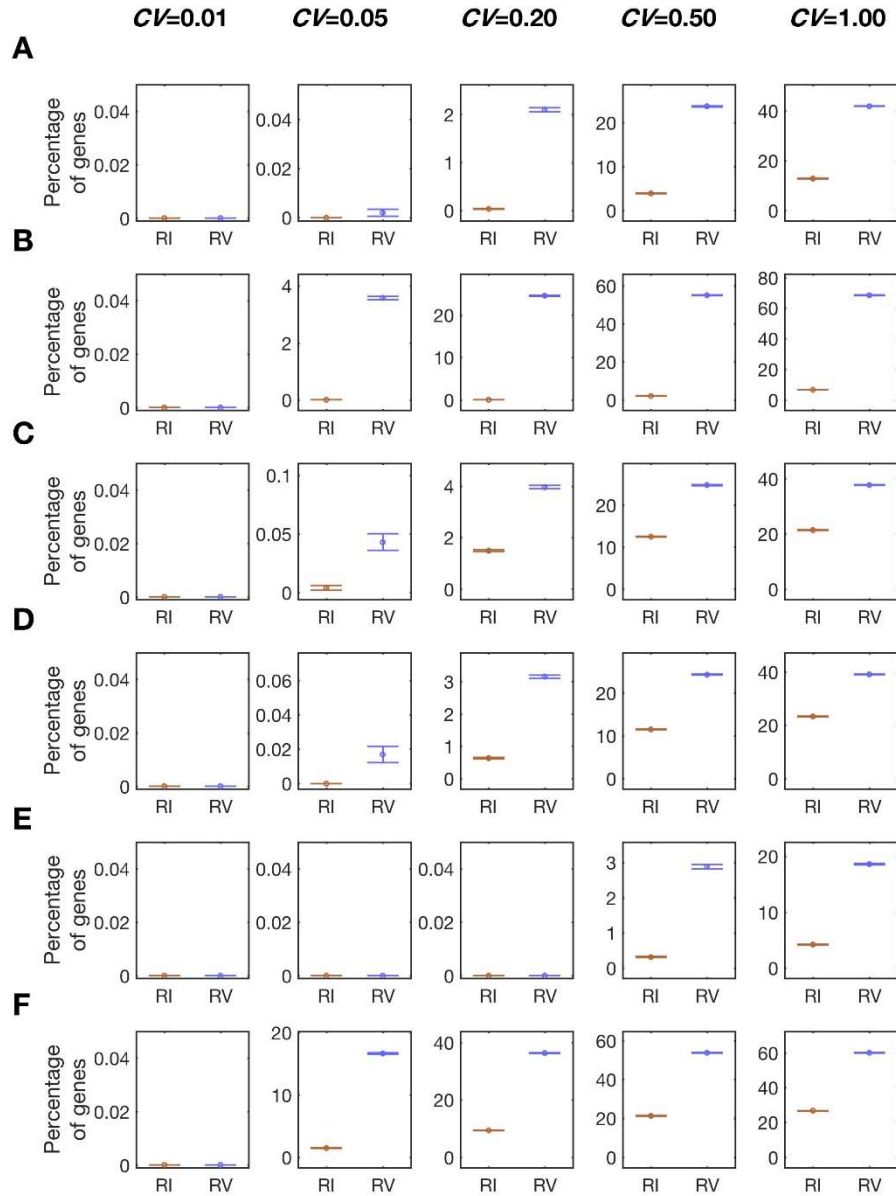

**Figure S2.** Rates of false identification of gene expression reversion (RV) and reinforcement (RI) determined by computer simulation. The mean expression level ( $\mu$ ) used = 1000. The coefficient of variation (CV) used is marked on the top of each column. Each row has a different combination of the cutoff ( $c$ ), sample size at original stage ( $n_o$ ), sample size at the plastic stage ( $n_p$ ), and sample size at the adapted stage ( $n_a$ ). Results shown are mean and standard errors estimated from 100 rounds of simulation, where each simulation contains 1000 hypothetical genes with the same  $\mu$  and CV. See main text for definitions of RV and RI. **(A)** Simulation results under  $n_o = 6$ ,  $n_p = 6$ ,  $n_a = 6$ , and  $c = 0.2L_o$ , where  $L_o$  is the observed mean expression level at stage  $o$ . **(B)** Simulation results under  $n_o = 6$ ,  $n_p = 1$ ,  $n_a = 6$ , and  $c = 0.2L_o$ . **(C)** Simulation results under  $n_o = 1$ ,  $n_p = 6$ ,  $n_a = 6$ , and  $c = 0.2L_o$ . **(D)** Simulation results under  $n_o = 6$ ,  $n_p = 6$ ,  $n_a = 1$ , and  $c = 0.2L_o$ . **(E)** Simulation results under  $n_o = 6$ ,  $n_p = 6$ ,  $n_a = 6$ , and  $c = 0.5L_o$ . **(F)** Simulation results under  $n_o = 6$ ,  $n_p = 6$ ,  $n_a = 6$ , and  $c = 0.05L_o$ .

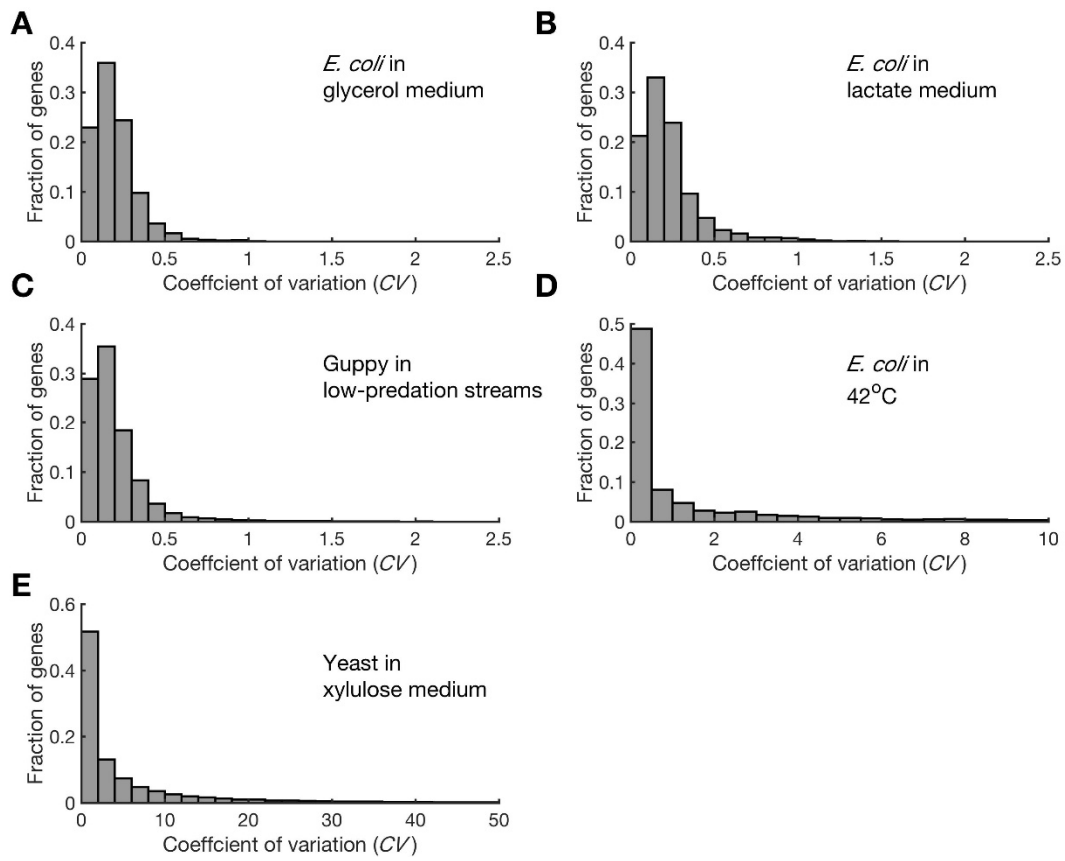

**Figure S3.** Distributions of coefficients of variation ( $CV$ ) in the five datasets of experimental evolutions.

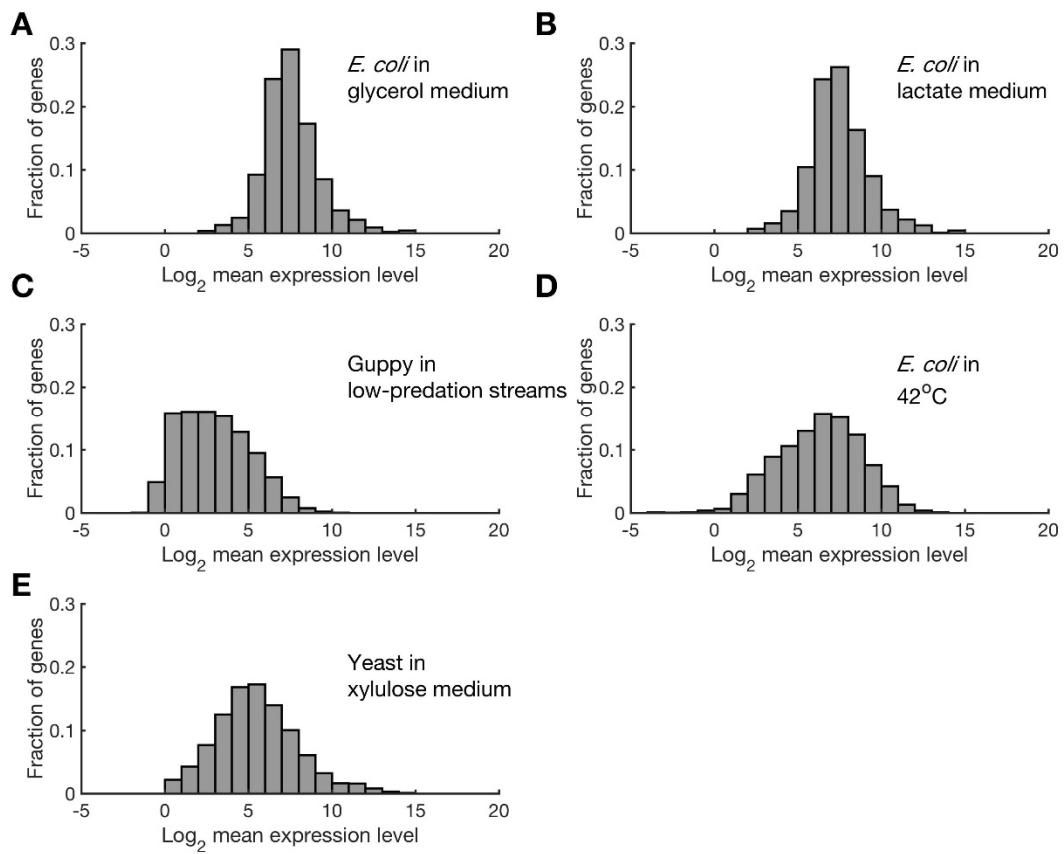

**Figure S4.** Distributions of mean expression levels in the five datasets of experimental evolution.
